# Supplementary material
Source: bioRxiv or medRxiv preprint supplement (https://www.biorxiv.org/highwire/filestream/51984/field_highwire_adjunct_files/7/173823-7.pdf)
Supplement: Supplementary file [file 173823-7.pdf]

**WT****DNR**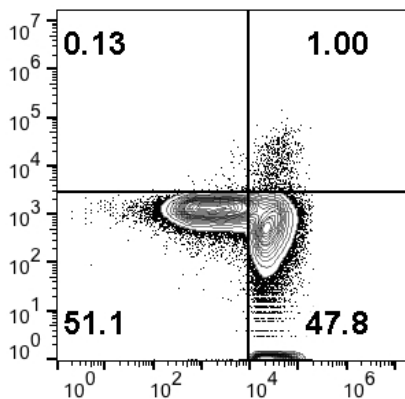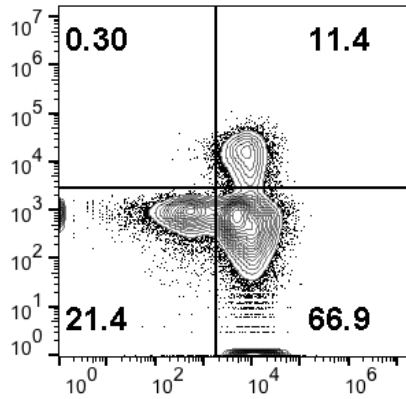

MLN

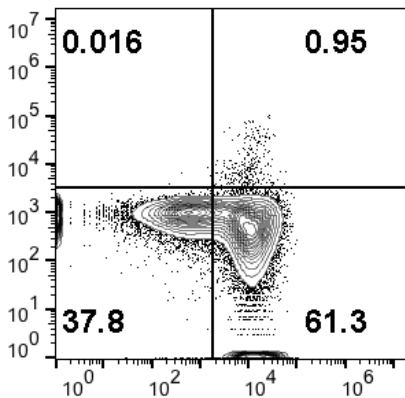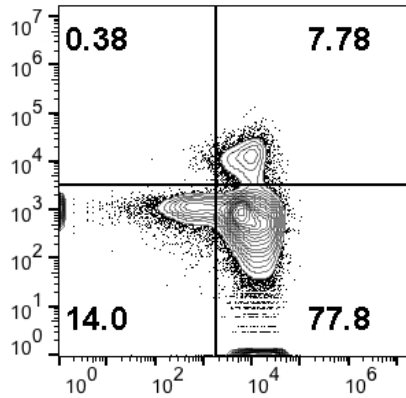

Spleen

KLRG1

CD44
